# Supplementary material
Source: publisher figshare collection journal article supplement (https://tandf.figshare.com/articles/dataset/_/5657947)
Supplement: Supplementary file 1 [file 1]

[illegible]

?????00010?0000001060000100??00110????0000000101?00???200101?0100?110?000  
0??010100000?1?????????1???0????010???1010?1110  
A\_adriaticus  
?????1?????????????01?100?1?????????010?10?????????01?????????0???0??100?  
?00??00010?000?0?10600001?0????120????00?00011010000?1?111?0?0100???0????  
0??010?0?0010???????????1???1???01?0?????1011?0?  
I\_makadii  
????????????????????????????????????????????????10124???????????110???00??10?  
1????0001??00000110610001?0???0120????00000010011000012111001?100?1?0?00?  
0???12???100?2?????1???1000000??110???1010?1110  
H\_vectiana  
?????????????????????????????????????????????????????????????????????????????0  
?????0????????????0?0?10001?00??0120?0?00000001001000?0?21110000120????1?0?  
000010100000000????1?001001000?0110?????10?????  
B\_threeensis  
????0????????????????01???????0??????1?00??20???01002??1?????10?11?00000100  
0?????????????????????????????????????????????????????????????????????????????  
????????????????????????????????????????????????????????????????10000  
B\_formidabilis  
000?000?0?11001001001000000101000001?000?20???0110200000?000?120000000100  
001?000020?0000?00231000100?00000010000000101001000101002001?11000000?00?  
011010100101000? ?????00100110000000??000010000  
B\_wilsoni  
??????0???????????1001000000101?000?1?000?20???01002??100?0?00110000020100  
0????00020?0?0???02310001????00001?0?0?0010100100010100200101100?000100?  
?111101001010000?00???010011?0?0000??00001????  
B\_acutidentatus  
????????????????????????????????0????????????????????002????????????000??????0  
?????00020?0?00??02310001????0000? ???0?0?0??????1?0020?1?1100?0?0?0??  
0?111010?101000? ??????010??1?0?0000??0000?????  
B\_sternbergii  
000000000?110010?1001000000101000001?00???0???011020000000?00020000000100  
000??00020?000000013100010001000001?0?000001110100010100000111100?000100?  
011000100101000000?1?00100110000000??000010000  
E\_mississippiensis  
??????0?????????????01??000? ??????00?00???0????122???3???????0?0???00?011?  
0????00120?000??1025000010??000000? ???0000101001000? ???000?000100???01???  
11100010?001?00???????100010000000??000010(0 1)00  
T\_neocesariensis  
??????0??????111?1?010????0011??0??0?00???0???1122???3?????????10?000?01?0  
?????00120?0000?10250000100??000000?0?00001010010000?000000000110?00010??  
1?100010000100000000?00100?10000000??000010???  
T\_macrorhynchus  
??????0???0?1111?1?01????00?????0???00???0???1?22???3???????0?10000000110  
0????00120?00?0?10250000100??000000?0?000010100100001100000000110?000100?  
11101010?0010000???0?0100010000000??0000?0100  
E\_minor  
??????0???0???111???01?00?0?01???0000?000??0???1122??0300?0000?20?00000110  
0????00120?0000?1025?000100?000000?00000001010010000?100000000110???0100?  
11?100100001?0100??1???101010101003???000010100  
E\_lerichei  
??????0??????01????01?????????1?????????0?????????1122???3?????????????????0  
?????00120?0000?10250000100?0000000??0000101001000001000000?0110?000?0??  
11?2001000010?1?????????10?01?101003???000010?00  
E\_africanus  
?????????1?????11???010????????????0?????????0???1122??03?????10?200000??110  
1????00120?000?01025?000100?0000000000000010100100000100000000121?000100?  
1111001000010100?000??0101010100000??00?010100

P\_jugaliperforatus

????????????????????????????????????1????????????11?2???3?????0002????????10?  
?????00120?0010010250000100?000000????0000101001000000?0000000111?1?00010  
11120010000200?0?1?0?0?12??1?10?000????010?0100

G\_colombianus

????0?0???001?????01?000?????????????????0???11223?030100?00020000000110  
0????0012010000?1025?000100?0?0000??0?000010100100000110000000121?000100?  
1111010000200000100?00121010100000???001010100

G\_lewisi

????????????????????010????????????????????????22???3?????0?200000??1?0  
?????00?30?0??????2??0?1?0?0?0000??0?0000?0?00100?0?1???00000121?000100?  
111?0?000010000?????00121010100000???001010?0?

G\_gangeticus

020000000?001111011010000000111000000?000000001122300300000000020000000110  
00100001301000001025?000100000000000000001010010000011000000012100001000  
11111010000100000000000121010100000001001010100

B\_vorax

????0?0???01001001?01?00000111??0100?10???1???1110?000?????0??2000001?1?0  
?????21010?0000?00030001100?000000??0?000000100100010100000111110???0100?  
021000100101000????01???1100110000002???000010000

B\_magnifrons

???????????????0?0???01?000?0??1??0100?1???1????11102000???????0?2????0??1?1  
?????21?20?00000000300011???000000?????0000001001010?1100000111110?0?0?00?  
0?110010?10100?????????1???10000002???00001?000

P\_hengdongensis

????????????????????1????????????????????????1110???1?????????{1  
2}????0?01?0?????20010?0?????01300??1????0?000????0???01001???????0?0?1?  
1100???????0?1?00100?0100?????1???1???10?10001???0000?0000

P\_datangensis

????????????????????????????????????????11?????0????????????????????  
?????20010?000??10030000100??0?000???????000??01???????0?0?1?1110???????  
0?100010010?0?0???????????????10??0?0???0000?0?00

L\_canadensis

????0?0????????1????010000011?1???10?0?11???11???0110?00000?0?01?20000001110  
1????00010?000000003000010000010001000100001110100010100010111100?0101001  
01200010010100000001?00100110010001???000010000

D\_riograndensis

??????0?????????????01?????????????????00???1???0110???001?0?11?10??0??11?0  
?????00??1?0??????0?00001???0??00011?00?0???????????????00?0111120?012210?  
1220001001?1000??000?0?????1??100?1???0000??000

D\_ratelii

??????0??????000???010?00?1111001400?10??21???01002101?????0112000001?110  
1????00120?00000012300001000101000??0?000000111100010100010111100??101001  
01100010110100000001?10100110010001???000010000

D\_hantoniensis

100???1?1?01000010001000011111??1400?101?21???011021010????01120000011110  
1????00120?0?000??11300?0100?1010001?0?000000101100010100010111100?110100?  
012010101101000??0?1??010011?010001???000010000

D\_muelleri

????????????????????1?01??1?????14?0?10??21???01002??2?????01120??1001110  
0????00120?10000012300001000101000????0000011110000010001?1?1100?110??0?  
02?01010110100?????????0100110010001???000?0?0?

D\_tormis

????????????????????1?????1??????????10??21???01?021?1?????01?2?00?????11?  
?????0?120??000001230000100?1010001???000000111100?0?100010111100?1101000  
01201010110100?0???1?001?0110010001???0000????0?

D\_darwini

100001001?010000?00010000?1111??1400?101121???011020010??0?01?20000011110

100??00020?0000?01030000100?0??000??0?0000001111?001010001?111100?110100?  
022010101101000??????0100110010001???00001?000  
B\_deponiae  
100?0?0??????0????01?0???1????14?0?10??21????1?02??0?????01?20??0??1110  
?????001???000??010300001?0????000?????0?0001?11000?010001?111100?110100?  
0??011?0?101?00?????????1???1??10001????0001?00?  
B\_montana  
101011001?1100???0001??000111100?000?103111???11101101?????01120?00001110  
100??00110?0002?11010000100?0010101?0?01000001111001012001111100?110200?  
02210010110102000101?00100110010001???000011001  
B\_sealeyi  
????????????????????????????????????????10???1???11101?0????????12??0000111?  
1????001?0?0002?1101000010???0101????????00????????10?200?1101?00????????  
???100??????2?????????????1??10??1?????0???0?  
S\_mccabei  
????110???010010?0001000001111001000?01??11???111010100????0112110000?110  
?????00110?0002?11020000100?001010????00000001111001012001111100?110200?  
0?2100102101000??1?1?0100110010001???00001?001  
C\_burdoshi  
????????????????????????????????????0?1????????1111??0?????01?20??00?11?0  
1????00010?0?01?01020000100???10?0?0???00????01???1?1?0??111100????????  
0???010?111????????????10??10010001?????0?1???  
H\_haupti  
001?1?0?1?????0???01?000?1111?????0??11?11???111110?0?????01?20??0??1110  
1????00010?00???010?00001?????0101?0?????0????????11001?111100?1?0200?  
02220010210101????????01???10010001???00001100?  
N\_mooki  
??????0?1?????0???0?00???1111??1??0?111111???11111010?????01?20??00??110  
?????00010?0001?010200001???0?1010?0???00?00?1110010110011111100???020??  
0222?0102101000?????1?010??10010001???000011001  
A\_polyodon  
????????????????????????????????????????????11111010?????01?21??00?111?  
1????00010?000??010200001?0??????0?0?00?00?0?111001?1?011?111100????????  
0??20010?101????????????1???1??1???1?????0?10?1  
A\_wartheni  
????1?0????????????0?0000?1111??1000?11???1???11111010?100?01121000001110  
1????00010?0000?0102000010000010101?0?000000?0111001?11011111100?110200?  
0222001021010000?1?1?0010011001?001???000011???  
P\_kayi  
????110?1??????0???010?00?1111??10?0?112121?????010?1??100?01?21000001110  
?????10?????0???010?00001???0?1010?0?000000011100?01101111111000??0200?  
022200102101010??????0100110010001?????011001  
P\_utahensis  
????????????????????????????????????????????110100?00??01011210??001110  
1????10110?0100?01020?00100??010?0???0000000?111001011011?111100?1?0200?  
02220010?101000????????0100110010001???0000?0???  
A\_gaudryi  
????????????????????????????????????????????11010??0?????01?200?0??1110  
?????1001??010??010200001?0???10?01000?000????11?0??11011?111100?1102?0?  
0?2210?0210100????????10011?010?01?????0?0?01  
W\_brachymanus  
????1?0???1?00?0???010000?1111001000?11???1???111110?0?????0??200?00?11?0  
?????00110?0000??10200??100???1000??0?100000???1??01?11011?111100????????  
0?22001??101000????????10011?010001???000011001  
A\_sinensis  
101011101?110010100010110111110011000112111110110000120?00101130000011110  
1??110010000100001020000100000100011001000000111100101101111111001102001  
02220010210101000111100100110010001111000010001

A\_mississippiensis 101011001?{0  
1}10010000010110111110011000112101100110001120100101130001011110100110010  
000100001020000100000100011100000000111100101101111111001102001022210102  
10101000111100100110010001001000010001  
A\_mefferdi  
????????????????????????????1????????11????110000120100001130001011110  
100??00100?0100?01020000100?0?10001?1?0000000?111001011011111110?110200?  
022210102101010??1???00100110010001???0000?0001  
A\_thomsoni  
????????????????01????????1?????0?1????????110000?2?????01130001001110  
1????00100?010000102000010?0010001?1?000000????1?????1011111110?1?02001  
02?21010210101?001?11?0100110010001???0000?0001  
A\_olseni  
??????0?1?????10???01?10011111???100?11????????11010010?????01130000001110  
1????00100?01000?10200?0100???1000?0?0?00010111101011011111110?110200?  
022200102101010?????00100?1?010001???000010???

A\_mcgreui  
100010001?010010?00010000111?1101??0?11???1???11110010?100?01120000011110  
1????00000?0100?01020000100?0010001?001000000111100101101111111000110200?  
022200102101010?01???00100110010001???000010001

A\_prenasalis  
10001?0?1?????10?0?01000011111???1000?112111???11101010?????01120000011110  
100??00000?0100?01020000100?0010001100100000011110010110111111100?110200?  
022200102101000001?1?00100110010001???000010001

E\_cavernensis  
????????????????????????????????????????1110???2?????11?2?????????  
?????00?????0?????0?????1?????100???0?1?0000???????0?????1?1?0?????0??  
?????0?????1?3?????????0??1?2?????????0?0001

T\_greenriverensis  
????????????????01????????????????10??20???1100???2????????2?????11??  
?01??00010?10????10?0001????????0????????????????0001?111?0?1?0????  
0??211???101?2????????????????100???????0??000

P\_trigonatus  
100111111?01001010001000111111211300011132112011002122211111120110001100  
101111011000010001020000100000100011000100010111101111000111111011102011  
0222111?210102000101100100110210001101000010000

P\_palpebrosus  
100111111?010010101010001111112113000111321120110021222111?11?20110001100  
?01111011000010001020000100000100011000100010111101111000111111011102011  
0222111?210102000101100100110210001111000010000

P\_neivensis  
101?100?1?000010?0??1????011???????0?11???1???1?00??1?1010?11130110001100  
1????00110?0001?01020000100?0010001?0?0?0000011101211111?111110?110201?  
0222011?210102000101?010??10210001???00?0?0?0?

O\_olseni  
????????????????????????????????????????00?????????????????????0  
?????00121?0?01??10?0?0?1?????000????01?000????????????11110????????  
0????11??101??0????????????????10001?????0?000?

M\_atopus  
10??100?1?00?010?00?1?10?011????1300?11???1???1102?112?????01120?10001100  
0????00121?0000?11050001100?0010001?0?0100000111012?1011??111110?110?00?  
???2111??111?30?????1???100110?10001???00?0??0?0

C\_yacare  
101111001?100010000010101111110011000111221110110021121010111020110201100  
10111001100000000112000010000010001100100000011101211110111111001102011  
02220111210103000101100100110210001002000010?01

C\_crocodilus  
101111001?100010000010101111110011000111221110110021121010111020110201100

1011100110000000011200001000001000110010000001111012111(0  
1)011111100110201102220111210103000101100100110210001002000010001  
C\_latirostris  
101110001?10001000001010?111110011000111221210110021121010111?20110201100  
???110011000000001020010100000100011001000000111101211100111111001102011  
02221111210103000101100100110210001002000010001  
C\_lutescens  
????????????????????????????????????????????????0????????????????????????  
?????00110?0000?01020010100?001000????1000000111101211200??1?1?10?????0??  
?????1????0????????????????????????100?1???0000?????  
M\_fisheri  
??????0????????0????????????????????????????????????02?????????1?12011????10?  
1????001?0?0000??1020010110???1000?0???0????11????2?11????11110?????????  
0????11??1010?????????010??1?2?0001???0000?????  
M\_niger  
101111001?1?0010000010101111110011000111221210110021121010111120110201100  
1??110011000000001020010110000100011001000000111101211100111111001102011  
02221111210103000101100100110210001002000010001  
B\_eversolei  
?????????????????01?????????????????1?????????11020100100000?20?00010101  
1????00110?0000110210000100??00000?0?00010011010001010001?111100?????00?  
0?221010?101000?????????1100010000003???0000????00  
C\_acer  
????????????????????????????????????????????????????????????????????????  
?????00110?0000?10210000100??000001???000100?10100010100010111100?002?01?  
01?2001001010001??0??11100010000003???000?????  
C\_depressifrons  
???00?00??11000010011100001111??1100?10???1???11102101?????00120000000101  
1????00110?0000?10110000100?1100001?0?0001001?01000101?0000111100?010200?  
01220010010100011001?11100010000003???000010100  
C\_affinis  
001001001?10001000011100001111001100?10???1???111021010100000120000000101  
100??00110?0000100110000100?010000?0?000100110100010100000111100?0?010??  
0122001001010001??0???1100010000003???000010000  
A\_germanicus  
001?0?0?1?001010?0101?000?1111??1??0?????1???11102000?????00120000??0101  
?00??00010?0000?0001000010???10000?0?00010???010001010000?111100???0100?  
012110100101000???????1100?10000003???000010100  
P\_langi  
????????????????????????????????????????????????????????????????????????  
?????00110?0000?0030000100??100001??000010011?1000101???0?111100???0?0??  
0?21?010?1010001??01?01100110000003???0000?????  
T\_schlegelii  
021000001?001010001011000111110110001013011011122?1040000010020000000101  
000010012000000110210000101010000110100010010010001011000011111000001101  
01221010010100011001011110010000003111000010100  
T\_lusitanica  
??????0?????????????01?????????????????10???1???1??2???4?????00?20000??0101  
?????00120?0000?1021?000101?100000110?00001010010001010000011110?0001?1?  
11221010010100011001??1110010000003???000010100  
T\_machikanensis  
00100100??1111110010110001111101100?00???1?????22??04?????10020?0000?101  
000??00120?000011004000010???00000????0000?010010000?100000011110??00?1??  
1??21010?1010???????????110010?00003???000010100  
G\_eggenbergensis  
?????????????????????1????????????????????????????????????????????????  
?????00120?0000?10240000100??00000????00?0101001000?012000?0?1110?0?????  
1?221010?10100?????????11???10000003???0000?0?0?

P\_courtii  
????????????????????????????????????????????????????????????0??20?00000101  
0????00????????????2??0?0??????0001?0????????????????0000?1??11?????1??  
1??200100001000?1000?101?0?100?00??????0?????  
T\_cairense  
????????????????????????????????????????????1??2???4????????2000001?101  
0????00?20?0?????025?0??1?0????000?0?000010100100010?00?0?01110???01??  
11?2001001010001??0???11?001?000003???0000?0?0?  
T\_antiqua  
02000000??001010?00011010111?1??11?0?00???1???1122???4?100????2000031?101  
?0???00120?0000110210000100?100000??0?0000101?0100010110000011110???011??  
112200100101010?00???11100100?2003???00001????  
T\_petrolica  
????????????????????????????1????????????????????????04?????0020?0?01?1?1  
0????00????????????2?00?0?0??00001???0?00101001?????1?00?0?1110?0?2?0??  
0??200?0000100?????????1???1???003???0000?????  
D\_densmorei  
001???0???111010?0001?0?001111??1?00????????1120???0????000200?0??0101  
?????00120?00?0?10210000100??00000????01?01010010001011000?011110????????  
1??20010?1010001???????10?01000?003???000010100  
K\_spenceri  
??????0????????????????????????????????????????1?????0?????0??2000?1101?1  
1????00110?0000?10210000100??0000?0?010010100100?1011000?111110?????0?  
0??20010?10100???????111?0?100?0?03???0000?????  
C\_megarhinus  
??????0????????????001????????????????????????11102101?????00120000??0101  
1????00110?0000?0023000010001?0000?0?000000110100010120000111110?002?11?  
0122?01001010?01100???1110010000003???0000?????  
A\_clarkae  
??????0????????1??0??1?????11??????0?10???1???1110?101?????00120000110101  
1????00110?000011021000010001000001?0?000000???????101000?0111110?002011?  
02220010010100011??1?1?001000?001???0000??000  
K\_implexids  
??????0?????????????01?????11?????1100?10???1???11102101?????00120000110101  
1????00110?000011021000010001000001?01000000100100010100000111110?002011?  
01220010010100011101?11110010000001???00001000?  
T\_rackhami  
????????????????????????????????????????????????????????????????????????  
?????0?????0?????2?0?0?0?0?1000????0?1?000001010???01?0?0111110???120111  
02221010000102011101?111?0?1000?001?????0?????  
Quinkana\_spp  
????????????????????????????????????????????11?0???1?????????????????1  
?????21010?0000?10(0 2)(1 5)00(0  
1)0?000100000????0?0?????????1??100?0111?10?002011101221010010102?11101?  
11?01?000???1?????????????  
M\_cataphractus  
10?001001?000010000011100111112012000111101101111041010100010020001110101  
?100100120000001002100001000100000110100001011010001010000011111000010111  
0122001001010001110101111001000000300?111010100  
C\_niloticus  
101000001?1010100010111001111120120001112011011110021010100010120001110101  
110010011000000100210000100110000(0 1)110100(0  
1)00011010001011000011111000010111012200100101000111010111100110000030110  
00010(0 1)00  
C\_porosus  
111000001?0010101010111000111120120001112011011110021010100010120001110101  
110010011000000100210001100110000010100(0

```

1)00011010001010000011111000010111012200100101000111010111100110000030110
00010(0 1)00
C_rhombifer
001000001?101010001011100111112011000111201101110021010100010120001110101
1100100110000001002101001001100000110100(0
1)00011010001011000011111000010111012200100111000111010111100110000030120
00010(0 1)00
E_arambourgii
????????????????????????????????????????????????????????0????????????????????1
?????00020?0000?10250001100?1000001101000000??0????0???000011110??11011?
012210100101100????1?11?0?1000?003???0000?0???
O_tetraspis
??1?00001?00101010001110011111201110011111101110021010100010120000110101
1100110100000101002100011000100000110110010111010101010001011111010010101
01221110010110011101011110110000003110000010100
O_osborni
??1?00001?00101010001110011111201110011111101110021010100000120000110101
1100110110000101002100011000100000110110010010010101010000011111010010101
0122111001011001110101111011000000310000001010?
V_robustus
??????0?????????0???011?????111??1110???????1???111021010100000120001111101
1????00110?0000?0021000110001000001101000101110101010100000111110?0010111
012201100111110?1101?11110010000003???000010100
R_lloydi
????????????????????????????????????????????????????????1????????????????????1
?????00110?0000?00210001100?100000110100000????10??1??1000?111110?001011?
012200100101100111?1??1110?1000?003?????00??0??
B_pigotti
??????????00?010?00?11??01111????????10???0???11102??1????????2???111???1
?????00010?0100?002100011000100000????0010101101010001?0?00111110???1?1??
012210100101100??1?1??1100?10000003???0000?010?
T_okani
????????????????????????????????????????????????????????0(0 1 2 4
5)1?2??????11????????????????????00?????????????(0 1 2 3
4)????????????1????????????????????????????????????????????????????????
????????????????????????????????1100
Unasuchus
????????????????????????????????????????????????????1?124??0????????0????????
?????00????00000???2????????0?1????????0????????????????1?0????????
???0????????1????????????????????????????????1100

;
end;

BEGIN LABELS;
null
END;

BEGIN SETS;

CHARPARTITION * matrices = Character_Matrix : 1-193 ;
charset Character_Matrix = 1-193;
END;

```
