# Supplementary material
Source: publisher figshare collection journal article supplement (https://tandf.figshare.com/articles/dataset/_/5657947)
Supplement: Supplementary file 4 [file 1]

## **Appendix 5: Origin of the data used in the paleogeographic distribution maps.**

### **Bernissartidae**

- Buffetaut, E.** 1975. Sur l'anatomie et la position systématique de *Bernissartia fagesii* Dollo, L., 1883, crocodilien du Wealdien de Bernissart, Belgique. *Bulletin de l'Institut Royal des Sciences Naturelles de Belgique, Sciences de la Terre*, **2**, 1–20.
- Buscalioni, A. D., Buffetaut, E. & Sanz, J. L.** 1984. An immature specimen of the crocodilian *Bernissartia* from the Lower Cretaceous of Galve (Province of Teruel, Spain). *Palaeontology*, **27**, 809–813.
- Buscalioni, A. D., Fregenal, M. A., Bravo, A., Poyato-Ariza, F. J., Sanchíz, B., Báez, A. M., Cambra Moo, O., Martín Closas, C., Evans, S. E. & Marugán Lobón, J.** 2008. The vertebrate assemblage of Buenache de la Sierra (Upper Barremian of Serranía de Cuenca, Spain) with insights into its taphonomy and palaeoecology. *Cretaceous Research*, **29**, 687–710, doi: 10.1016/j.cretres.2008.02.004.
- Cuny, G., Cobbett, A. M., Meunier, F. J. & Benton, M. J.** 2010. Vertebrate microremains from the Early Cretaceous of southern Tunisia. *Geobios*, **43**, 615–628.
- Eaton, J. G., Cifelli, R. L., Hutchinson, J. H., Kirkland, J. I. & Parrish, J. M.** 1999. Cretaceous vertebrate faunas from the Kaiparowits Plateau, South-Central Utah. *Utah Geological Survey Miscellaneous Publication*, 345–353.
- Martin, J. E. & Delfino, M.** 2009. Recent advances on the comprehension of the biogeography of Cretaceous European eusuchians. *Palaeogeography, Palaeoclimatology, Palaeoecology*, **293**, 406–418.
- Mazin, J. M., Pouech, J., & Raslan-Loubatie, J.** 2009. The bernissartids: common European crushing crocodiles. In: P. Godefroit and O. Lambert (Eds.) *Tribute to Charles Darwin and Bernissart iguanodonts: new perspectives on vertebrate evolution and Early Cretaceous ecosystems*. Darwin-Bernissart Symposium, Brussels, **2009**, p.69.
- Monjon, P. O.** 2006. Paléokarst, crocodile nains et micropaléontologie du Valanginien d'Arzier (Jura Suisse). *Archives des Sciences*, **59**, 49–62.
- Oreska, M. P. J., Carrano, M. T. & Dzikiewicz, K. M.** 2013. Vertebrate paleontology of the Cloverly Formation (Lower Cretaceous), I: faunal composition, biogeographic relationships, and sampling. *Journal of Vertebrate Paleontology*, **33**, 264–292, doi: 10.1080/02724634.2012.717567.

- Ortega, F., Jimenez, A. & Pérez-García, A.** 2010. A *Bernissartia* (crocodyliformes, neosuchia) individual from the Barremian of La Rioja (Spain). *Mésogée*, **66**, 31.
- Schwarz-Wings, D., Rees, J. & Lindgren, J.** 2009. Lower Cretaceous Mesoeucrocodylians from Scandinavia (Denmark and Sweden). *Cretaceous Research*, **30**, 1345–1355, doi: 10.1016/j.cretres.2009.07.011.
- Sweetman, S., Pedreira-Segade, U. & Vidovic, S.** 2014. A new bernissartiid crocodyliform from the Lower Cretaceous Wessex Formation (Wealden Group, Barremian) of the Isle of Wight, southern England. *Acta Palaeontologica Polonica*, doi: 10.4202/app.00038.2013.
- Winkler, D. A., Murry, P. A. & Jacobs, L. L.** 1990. Early Cretaceous (Comanchean) vertebrates of central Texas. *Journal of Vertebrate Paleontology*, **10**, 95–116.

### **Hylaeochampsidae**

- Andrews, C. W.** 1913. On the skull and part of the skeleton of a crocodile from the Middle Purbeck of Swanage, with a description of a new species (*Pholidosaurus laevis*), and a note on the skull of *Hyleochampsia*. *Annals and Magazine of Natural History*, **8**, 485–494.
- Brinkmann, W.** 1992. Die Krokodilien-Fauna aus der Unter-Kreide (Ober-Barremium) von Uña (Provinz Cuenca, Spanien). *Berliner geowissenschaftliche Abhandlungen, Reihe E*, **123**.
- Martin, J. E. & Delfino, M.** 2009. Recent advances on the comprehension of the biogeography of Cretaceous European eusuchians. *Palaeogeography, Palaeoclimatology, Palaeoecology*, **293**, 406–418.
- Pol, D., Turner, A. H. & Norell, M. A.** 2009. Morphology of the Late Cretaceous crocodylomorph *Shamosuchus djadochtaensis* and a discussion of neosuchian phylogeny as related to the origin of Eusuchia. *Bulletin of the American Museum of Natural History*, **324**, 1–103.
- Rogers, J. V.** 2003. *Pachycheilosuchus trinquei*, a new procelous crocodyliform from the Lower Cretaceous (Albian) Glen Rose Formation of Texas. *Journal of Vertebrate Paleontology*, **23**, 128–145.

### **Allodaposuchidae**

- Blanco, A., Puértolas-Pascual, E., Marmi, J., Vila, B. & Sellés, A. G.** 2014. *Allodaposuchus palustris* sp. nov. from the Upper Cretaceous of Fumanya (South-Eastern Pyrenees, Iberian Peninsula): Systematics, Palaeoecology and Palaeobiogeography of the Enigmatic Allodaposuchian Crocodylians. *PLoS ONE*, **9**, e115837, doi: 10.1371/journal.pone.0115837.
- Blanco, A., Fortuny, J., Vicente, A., Luján, À. H., García-Marçà, J. A. & Sellés, A. G.** 2015. A new species of *Allodaposuchus* (Eusuchia, Crocodylia) from the Maastrichtian (Late Cretaceous) of Spain: phylogenetic and paleobiological implications. *PeerJ*, **3**, e1171, doi: 10.7717/peerj.1171.
- Martin, J. E. & Delfino, M.** 2009. Recent advances on the comprehension of the biogeography of Cretaceous European eusuchians. *Palaeogeography, Palaeoclimatology, Palaeoecology*, **293**, 406–418.
- Narváez, I., Brochu, C. A., Escaso, F., Pérez-García, A. & Ortega, F.** 2015. New Crocodyliforms from Southwestern Europe and Definition of a Diverse Clade of European Late Cretaceous Basal Eusuchians. *PLOS ONE*, **10**, e0140679, doi: 10.1371/journal.pone.0140679.
- Narváez, I., Brochu, C. A., Escaso, F., Pérez-García, A. & Ortega, F.** 2016. New Spanish Late Cretaceous eusuchian reveals the synchronic and sympatric presence of two allodaposuchids. *Cretaceous Research*, **65**, 112–125.
