# Supplementary material
Source: publisher figshare collection journal article supplement (https://tandf.figshare.com/articles/dataset/_/5657947)
Supplement: Supplementary file 5 [file 1]

| Tooth position | Allodaposuchidae  |                       |                      | Hylaeochampsidae |                         |                   |
|----------------|-------------------|-----------------------|----------------------|------------------|-------------------------|-------------------|
|                | <i>B. fagesii</i> | <i>A. fontisensis</i> | <i>L. megadontos</i> | <i>T. okani</i>  | <i>A. iberoccitanus</i> | <i>I. makadii</i> |
| 6              |                   | 0.812                 | 1.29                 | 0.472            | 0.35                    | 0.255             |
| 7              |                   | 0.931                 | 1.143                | 0.476            | 0.45                    | 0.271             |
| 8              |                   | 0.738                 | 1.074                | 0.476            | 0.4                     | 0.282             |
| 9              |                   | 0.91                  | 1.155                | 0.808            | 0.4                     | 0.275             |
| 10             | 0.225             | 1.287                 | 2.102                | 0.925            | 0.4                     | 0.291             |
| 11             | 0.243             | 1.233                 | 1.912                | 0.863            | 0.41                    | 0.322             |
| 12             | 0.366             | 1.061                 | 1.492                | 0.729            | 0.48                    | 0.432             |
| 13             | 0.311             | 0.938                 | 1.393                | 0.981            | 0.6                     | 0.579             |
| 14             | 0.279             | 1.047                 | 1.239                | 1.088            | 0.62                    | 1.034             |
| 15             | 0.355             | 0.888                 |                      | 1.154            | 0.7                     | 0.522             |
| 16             | 0.398             | 0.947                 |                      |                  | 0.6                     |                   |
| 17             | 0.454             | 0.803                 |                      |                  |                         |                   |
| 18             | 0.527             |                       |                      |                  |                         |                   |
| 19             | 0.451             |                       |                      |                  |                         |                   |
| 20             | 0.355             |                       |                      |                  |                         |                   |

|                   |
|-------------------|
| <i>U. reginae</i> |
| 0.12              |
| 0.13              |
| 0.14              |
| 0.13              |
| 0.14              |
| 0.13              |
| 0.15              |
| 0.14              |
| 0.16              |
| 0.21              |
| 0.28              |
| 0.39              |
| 0.29              |
|                   |
|                   |

shape from  
reconstruction
